# Supplementary material for: Prognosis and Biological Function of CYB5R Family in Cervical Squamous Cell Carcinoma and Endocervical Adenocarcinoma: A Multi-omics Analysis
Source: Research Square preprint supplement (doi:10.21203/rs.3.rs-5675795/v1), 2025-04-28
Supplement: Supplementary file 1 [file 769dccc55908801384813827.docx]

Supplementary Table 1: primer pairs of CYB5R1-4

| Gene name | | Forward (5’>3’) | Reverse (5’>3’) |
| --- | --- | --- | --- |
| CYB5R1 | AGACAAGACGACTGTGAGCC | | TGACAGGAGTGTATGGCCTG |
| CYB5R2 | CAGACCAGACCAGACGAGTG | | GCTGCAACATGGGTGTGATG |
| CYB5R3 | GGCCAGCACATCTACCTCTC | | GAGACATCTTCCCTCCAGCG |
| CYB5R4 | GAATGGAATGGCAAACAGGGAC | | GAGATCATGCAGCAACCTTACTC |
